# Supplementary material for: Targeting Cyclooxygenase-2 in Pheochromocytoma and Paraganglioma: Focus on Genetic Background
Source: MDPI journal article supplement (doi:10.3390/cancers11060743), 2019-05-28
Supplement: s1 [file s1]

**Table S 1: Statistical analyses of COX-2 status with regard to clinical characteristics and genetic background of tumors in two independent series of PPGL samples;** data in parentheses were calculated from low sample numbers ( $n < 7$ ); as Mann-Whitney  $U$  test showed significant sex-related differences in COX-2 immunoreactivity in tissue samples, multiple regression analyses was applied to distinguish whether the trends observed in the genetic subgroups were related to genetic background or different sex ratios only; levels of significance: \*  $P < 0.05$ ; †  $P < 0.01$ , ‡  $P < 0.001$

| COX-2 expression levels in RNA samples                            |                                             |                |                  |
|-------------------------------------------------------------------|---------------------------------------------|----------------|------------------|
| <i>Mann-Whitney U tests</i>                                       |                                             |                | <i>P</i> value   |
| Sex                                                               | male vs. female                             |                | 0.455            |
| Malignancy                                                        | benign vs. metastatic                       |                | 0.825            |
| Tumor location                                                    | adrenal vs. others                          |                | 0.486            |
|                                                                   | (adrenal + thoracic & abdominal) vs. others |                | (0.847)          |
|                                                                   | thoracic & abdominal vs. others             |                | 0.767            |
|                                                                   | (head & neck) vs. others                    |                | (0.010*)         |
| <i>Pearson correlation</i>                                        |                                             | <i>r</i>       | <i>P</i> value   |
| Age at diagnosis                                                  |                                             | −0.2119        | 0.088            |
| Tumor diameter                                                    |                                             | −0.2201        | 0.197            |
| Mutation                                                          | VHL                                         | 0.371          | 0.002†           |
|                                                                   | SDHx                                        | 0.098          | 0.419            |
|                                                                   | SDHB                                        | −0.145         | 0.232            |
|                                                                   | (SDHD)                                      | (0.252)        | (0.035*)         |
|                                                                   | EPAS1                                       | 0.015          | 0.903            |
|                                                                   | (NF1)                                       | (−0.207)       | (0.086)          |
|                                                                   | RET                                         | −0.267         | 0.025            |
|                                                                   | HRAS                                        | −0.121         | 0.318            |
| Transcriptional signature                                         | cluster I                                   | 0.406          | < 0.001‡         |
| Origin of mutations                                               | germline                                    | 0.03           | 0.804            |
| COX-2 immunoreactivity in tissue samples                          |                                             |                |                  |
| <i>Mann-Whitney U tests</i>                                       |                                             |                | <i>P</i> value   |
| Sex                                                               | male vs. female                             |                | 0.030*           |
| Malignancy                                                        | benign vs. metastatic                       |                | 0.775            |
| Tumor location                                                    | adrenal vs. others                          |                | 0.587            |
|                                                                   | thoracic & abdominal vs. others             |                | 0.673            |
|                                                                   | head & neck vs. others                      |                | 0.273            |
| <i>Pearson correlation</i>                                        |                                             | <i>r</i>       | <i>P</i> value   |
| Age at diagnosis                                                  |                                             | −0.1606        | 0.124            |
| Tumor diameter                                                    |                                             | −0.1677        | 0.127            |
| <i>Multiple linear regression considering sex of the patients</i> |                                             | <i>r</i>       | <i>P</i> value   |
| Mutation                                                          | VHL ; male                                  | 0.328; 0.307   | 0.144; 0.053     |
|                                                                   | SDHx ; male                                 | 0.032; 0.318   | 0.842; 0.048*    |
|                                                                   | (SDHA) ; male                               | (0.135); 0.317 | (0.706); 0.049*  |
|                                                                   | SDHB ; male                                 | 0.081; 0.311   | 0.771; 0.056     |
|                                                                   | (SDHC) ; male                               | (0.221); 0.324 | (0.630); 0.044*  |
|                                                                   | SDHD ; male                                 | 0.867; 0.398   | < 0.001‡; 0.007† |
|                                                                   | (SDHAF2) ; male                             | (0.253); 0.330 | (0.528); 0.041*  |
|                                                                   | EPAS1 ; male                                | −0.175; 0.300  | 0.576; 0.067*    |
|                                                                   | NF1 ; male                                  | 0.298; 0.303   | 0.120; 0.056     |
|                                                                   | RET ; male                                  | −0.948; 0.335  | < 0.001‡; 0.026* |
|                                                                   | (HRAS) ; male                               | −0.130; 0.313  | 0.694; 0.052     |
| Transcriptional signature                                         | cluster I; male                             | 0.159; 0.323   | 0.332; 0.043*    |
| Origin of mutations                                               | germline; male                              | −0.014; 0.319  | 0.928; 0.047*    |
| COX-2 histologic pattern in tissue samples                        |                                             |                |                  |
| <i>Pearson correlation</i>                                        |                                             | <i>r</i>       | <i>P</i> value   |
| Mutation                                                          | VHL                                         | 0.040          | 0.700            |
|                                                                   | SDHx                                        | 0.266          | 0.009†           |
|                                                                   | (SDHA)                                      | (−0.057)       | (0.582)          |
|                                                                   | SDHB                                        | 0.092          | 0.375            |
|                                                                   | (SDHC)                                      | (0.137)        | (0.182)          |
|                                                                   | SDHD                                        | 0.194          | 0.058            |
|                                                                   | (SDHAF2)                                    | (0.084)        | (0.414)          |
|                                                                   | NF1                                         | −0.031         | 0.767            |
|                                                                   | (HRAS)                                      | (−0.081)       | (0.431)          |
|                                                                   | (EPAS)                                      | (−0.190)       | (0.065)          |
| Transcriptional signature                                         | cluster I                                   | 0.197          | 0.054            |
| Origin of mutations                                               | germline                                    | 0.242          | 0.018*           |
