# Supplementary material for: Targeting Cyclooxygenase-2 in Pheochromocytoma and Paraganglioma: Focus on Genetic Background
Source: MDPI journal article supplement (doi:10.3390/cancers11060743), 2019-05-28
Supplement: s1 [file s1]

**Table S2:** Pearson correlation between expression of COX-2 in the RNA sample cohort and 97 hypoxia-related genes in PPGLs

| Hypoxia cross probes + SDH/VHL | Gene      | <i>r</i> | <i>P</i> -value |
|--------------------------------|-----------|----------|-----------------|
| A_24_P192485                   | TNFRSF11B | 0.634    | <0.001          |
| A_23_P71530                    | TNFRSF11B | 0.569    | <0.001          |
| A_23_P11685                    | PLA2G4A   | 0.564    | <0.001          |
| A_23_P34345                    | VCAM1     | 0.553    | <0.001          |
| A_23_P416395                   | STC2      | 0.553    | <0.001          |
| A_23_P17095                    | TFPI      | 0.541    | <0.001          |
| A_24_P96403                    | RUNX1     | 0.534    | <0.001          |
| A_24_P159434                   | CD300A    | 0.491    | <0.001          |
| A_24_P185854                   | DMD       | 0.487    | <0.001          |
| A_23_P202978                   | CASP1     | 0.485    | <0.001          |
| A_23_P121253                   | TNFSF10   | 0.482    | <0.001          |
| A_23_P58396                    | PDGFC     | 0.476    | <0.001          |
| A_23_P158725                   | SLC16A3   | 0.470    | <0.001          |
| A_23_P20494                    | NDRG1     | 0.470    | <0.001          |
| A_24_P48723                    | PTGIS     | 0.463    | <0.001          |
| A_23_P8108                     | HLA-DQB1  | 0.453    | <0.001          |
| A_24_P314179                   | ETS2      | 0.445    | <0.001          |
| A_23_P76992                    | PGF       | 0.432    | <0.001          |
| A_23_P257924                   | ETS2      | 0.429    | <0.001          |
| A_23_P17354                    | GDAP1L1   | -0.420   | <0.001          |
| A_23_P150768                   | SLCO2B1   | 0.412    | <0.001          |
| A_24_P329795                   | C10orf10  | 0.396    | <0.001          |
| A_24_P393740                   | FYB       | 0.394    | <0.001          |
| A_23_P110686                   | STC2      | 0.392    | <0.001          |
| A_24_P148717                   | CCR1      | 0.391    | <0.001          |
| A_23_P330070                   | TFPI      | 0.390    | <0.001          |
| A_23_P91095                    | CD28      | 0.388    | <0.001          |
| A_24_P402222                   | HLA-DRB3  | 0.386    | <0.001          |
| A_23_P368691                   | ABCC9     | 0.377    | <0.001          |
| A_23_P207037                   | CD300A    | 0.374    | <0.001          |
| A_24_P935986                   | BCAT1     | 0.370    | <0.001          |
| A_23_P203920                   | SSPN      | 0.355    | <0.001          |
| A_23_P120472                   | TFAP2C    | 0.355    | <0.001          |
| A_24_P52921                    | BCAT1     | 0.353    | <0.001          |
| A_24_P125096                   | MT1X      | 0.351    | <0.001          |
| A_23_P303242                   | MT1X      | 0.350    | <0.001          |
| A_32_P175739                   | HK2       | 0.349    | <0.001          |
| A_23_P35597                    | C10orf10  | 0.345    | <0.001          |
| A_23_P165136                   | LRRC25    | 0.344    | <0.001          |
| A_24_P343695                   | RET       | -0.339   | <0.001          |
| A_23_P151506                   | PLEK2     | 0.338    | <0.001          |
| A_23_P122127                   | FYB       | 0.337    | <0.001          |
| A_23_P113212                   | TMEM45A   | 0.331    | <0.001          |
| A_23_P137391                   | ENO1      | 0.331    | <0.001          |
| A_23_P29005                    | SAMSN1    | 0.331    | <0.001          |
| A_23_P327551                   | CPNE4     | -0.327   | <0.001          |
| A_24_P365767                   | CYBB      | 0.320    | 0.001           |
| A_23_P360379                   | EGLN3     | 0.318    | 0.001           |

|              |          |        |       |
|--------------|----------|--------|-------|
| A_23_P83579  | ARNT2    | -0.316 | 0.001 |
| A_23_P87528  | BCAT1    | 0.314  | 0.001 |
| A_23_P85240  | TLR7     | 0.309  | 0.002 |
| A_24_P237586 | ANKRD37  | 0.306  | 0.002 |
| A_23_P571    | SLC2A1   | 0.298  | 0.002 |
| A_23_P145336 | HLA-DRB3 | 0.295  | 0.003 |
| A_24_P388528 | ST6GAL1  | 0.286  | 0.004 |
| A_32_P133072 | SPON1    | 0.286  | 0.004 |
| A_23_P315273 | MT3      | 0.283  | 0.004 |
| A_23_P136683 | HLA-DQB1 | 0.279  | 0.005 |
| A_23_P398460 | HK2      | 0.269  | 0.006 |
| A_23_P217258 | CYBB     | 0.268  | 0.006 |
| A_23_P38630  | SSTR2    | -0.266 | 0.007 |
| A_23_P318800 | SSTR2    | -0.264 | 0.007 |
| A_24_P111054 | SLC2A5   | -0.258 | 0.009 |
| A_24_P382661 | ETS2     | 0.254  | 0.010 |
| A_23_P205355 | SERPINA5 | 0.251  | 0.011 |
| A_24_P10226  | SEMA6D   | -0.249 | 0.012 |
| A_23_P51187  | PRKCZ    | 0.245  | 0.013 |
| A_23_P101208 | CYB5A    | 0.244  | 0.013 |
| A_23_P8175   | PLAGL1   | 0.241  | 0.015 |
| A_23_P129629 | MT3      | 0.239  | 0.016 |
| A_24_P300952 | APLP2    | -0.238 | 0.016 |
| A_24_P321766 | SERPINA5 | 0.236  | 0.017 |
| A_23_P145846 | MET      | -0.232 | 0.019 |
| A_24_P183994 | RASEF    | -0.231 | 0.020 |
| A_24_P105501 | ENO1     | 0.229  | 0.020 |
| A_23_P65717  | THSD4    | -0.230 | 0.020 |
| A_23_P90696  | TRIB2    | 0.219  | 0.027 |
| A_24_P404822 | APLN     | 0.219  | 0.027 |
| A_23_P407565 | CX3CR1   | 0.218  | 0.028 |
| A_23_P86012  | LAMB3    | 0.218  | 0.028 |
| A_23_P389281 | HOXA13   | -0.217 | 0.029 |
| A_23_P201193 | TSPAN2   | 0.211  | 0.033 |
| A_23_P111311 | AKAP12   | 0.207  | 0.037 |
| A_23_P420442 | SEMA6D   | -0.200 | 0.044 |
| A_24_P9090   | HNRPDL   | -0.197 | 0.047 |
| A_24_P38387  | NDRG1    | 0.195  | 0.050 |
| A_23_P113393 | APLN     | 0.191  | 0.055 |
| A_24_P178503 | ABCC9    | 0.189  | 0.057 |
| A_23_P420692 | PPFIA4   | 0.189  | 0.058 |
| A_23_P145844 | MET      | -0.189 | 0.056 |
| A_23_P338981 | CYGB     | -0.184 | 0.065 |
| A_24_P67350  | SLC24A3  | -0.184 | 0.065 |
| A_24_P305541 | TRIB3    | -0.179 | 0.072 |
| A_32_P231568 | RASEF    | -0.173 | 0.082 |
| A_23_P160159 | SLC2A5   | 0.170  | 0.088 |
| A_23_P325726 | ACOT11   | -0.169 | 0.090 |
| A_23_P138635 | BNIP3    | 0.167  | 0.093 |
| A_23_P124084 | LOXL1    | 0.167  | 0.094 |
| A_23_P119943 | IGFBP2   | 0.163  | 0.101 |
| A_24_P295010 | SERPINB9 | 0.163  | 0.101 |

|              |         |        |       |
|--------------|---------|--------|-------|
| A_23_P141346 | MPP3    | -0.163 | 0.101 |
| A_24_P136866 | SLC8A1  | -0.160 | 0.107 |
| A_23_P132027 | SPAG4   | 0.156  | 0.118 |
| A_32_P110372 | SLC8A1  | -0.152 | 0.128 |
| A_24_P51037  | C2orf3  | -0.152 | 0.127 |
| A_23_P214897 | AKAP12  | 0.147  | 0.141 |
| A_23_P31306  | HOXA13  | -0.144 | 0.149 |
| A_23_P25674  | CKB     | -0.143 | 0.152 |
| A_23_P321860 | DMD     | 0.140  | 0.161 |
| A_23_P124252 | CAMK1D  | 0.138  | 0.166 |
| A_24_P133288 | PKP2    | -0.138 | 0.167 |
| A_23_P79978  | SLC24A3 | 0.132  | 0.187 |
| A_24_P5153   | THSD4   | -0.126 | 0.206 |
| A_23_P91619  | MIF     | 0.121  | 0.225 |
| A_24_P309521 | KCNJ5   | -0.120 | 0.230 |
| A_23_P91262  | PTGIS   | 0.117  | 0.243 |
| A_23_P218918 | FGF2    | -0.116 | 0.244 |
| A_32_P208120 | CAMK1D  | 0.115  | 0.250 |
| A_23_P417415 | ACOT11  | -0.115 | 0.249 |
| A_24_P917783 | RUNX1   | 0.110  | 0.272 |
| A_23_P141345 | MPP3    | -0.109 | 0.277 |
| A_23_P201711 | S100A6  | 0.108  | 0.281 |
| A_24_P913900 | SLC8A1  | -0.105 | 0.293 |
| A_24_P284353 | TMEM107 | 0.104  | 0.300 |
| A_24_P941441 | GNA13   | -0.101 | 0.311 |
| A_24_P226755 | TOX     | 0.098  | 0.328 |
| A_23_P118791 | TMEM107 | 0.097  | 0.333 |
| A_23_P202939 | APLP2   | -0.097 | 0.333 |
| A_23_P213153 | HNRPD   | -0.097 | 0.331 |
| A_32_P199796 | DMD     | -0.099 | 0.324 |
| A_23_P202927 | KCNJ5   | -0.094 | 0.347 |
| A_24_P34186  | DMD     | -0.085 | 0.397 |
| A_23_P216167 | PSD3    | 0.082  | 0.411 |
| A_24_P163168 | PDGFC   | 0.081  | 0.418 |
| A_32_P228618 | RBMS3   | 0.080  | 0.422 |
| A_23_P78281  | GNA13   | -0.078 | 0.433 |
| A_23_P162466 | PKP2    | -0.076 | 0.448 |
| A_24_P62659  | TSPAN2  | 0.074  | 0.461 |
| A_24_P914519 | CYBB    | 0.073  | 0.466 |
| A_23_P356755 | CEBPG   | 0.070  | 0.487 |
| A_23_P117782 | LARP6   | -0.067 | 0.501 |
| A_24_P924462 | PRKCZ   | -0.067 | 0.505 |
| A_23_P210690 | TRIB3   | -0.063 | 0.528 |
| A_23_P6849   | CCR1    | 0.062  | 0.539 |
| A_23_P128728 | ARG2    | 0.059  | 0.554 |
| A_32_P147078 | SLC8A1  | 0.057  | 0.567 |
| A_24_P61537  | CKB     | -0.058 | 0.565 |
| A_23_P20392  | PSD3    | 0.054  | 0.591 |
| A_23_P52121  | PDZK1   | -0.053 | 0.600 |
| A_23_P359245 | MET     | 0.051  | 0.613 |
| A_23_P10995  | RBMS3   | -0.049 | 0.621 |
| A_24_P342388 | DMD     | 0.048  | 0.630 |

|              |          |        |       |
|--------------|----------|--------|-------|
| A_24_P312041 | PLAGL1   | 0.047  | 0.639 |
| A_23_P26847  | SOX9     | 0.047  | 0.640 |
| A_24_P396753 | TRIB2    | 0.044  | 0.660 |
| A_23_P62437  | TLR7     | 0.043  | 0.670 |
| A_23_P30363  | P4HA2    | 0.042  | 0.676 |
| A_24_P390784 | SREBF1   | -0.042 | 0.677 |
| A_23_P18966  | P4HA2    | -0.043 | 0.665 |
| A_24_P239676 | HLA-DQB1 | 0.040  | 0.688 |
| A_23_P123413 | TOX      | 0.040  | 0.692 |
| A_32_P38323  | SERPINB9 | 0.034  | 0.734 |
| A_23_P129786 | SREBF1   | -0.032 | 0.752 |
| A_23_P30687  | SERPINB9 | -0.030 | 0.761 |
| A_24_P397043 | ST6GAL1  | -0.023 | 0.822 |
| A_24_P18146  | PSD3     | 0.020  | 0.844 |
| A_23_P148249 | THSD4    | -0.016 | 0.869 |
| A_24_P213134 | SLC16A3  | -0.015 | 0.878 |
| A_23_P120062 | C2orf3   | -0.014 | 0.890 |
| A_24_P359942 | RBMS3    | -0.012 | 0.908 |
| A_23_P147755 | APLN     | 0.000  | 0.997 |

---
